# Supplementary material for: Observation of van der Waals reconfiguration in superlattice phase change materials
Source: Royal Society of Chemistry journal article supplement (doi:10.1039/c9nr03033f), 2019-01-01
Supplement: c9nr03033f1.pdf [file c9nr03033f1.pdf]

# Observation of van der Waals Reconfiguration in GeTe/Sb<sub>2</sub>Te<sub>3</sub> Superlattice

Xin Chen<sup>a,b</sup>, Jiabin Shen<sup>a,d</sup>, Shujing Jia<sup>a,c,d</sup>, Yonghui Zheng<sup>a</sup>, Shilong Lv<sup>a</sup>, Zhitang Song<sup>a</sup> and Min Zhu<sup>a,\*</sup>

<sup>a</sup>State Key Laboratory of Functional Materials for Informatics, Shanghai Institute of Micro-system and Information Technology, Chinese Academy of Sciences, Shanghai 200050, China

<sup>b</sup>School of Physical Science and Technology, ShanghaiTech University, Shanghai 201210, China

<sup>c</sup>Key Laboratory of Microelectronic Devices & Integrated Technology, Institute of Microelectronics, Chinese Academy of Sciences, Beijing 100029, China

<sup>d</sup>University of the Chinese Academy of Sciences, Beijing 100049, China

\*minzhu@mail.sim.ac.cn

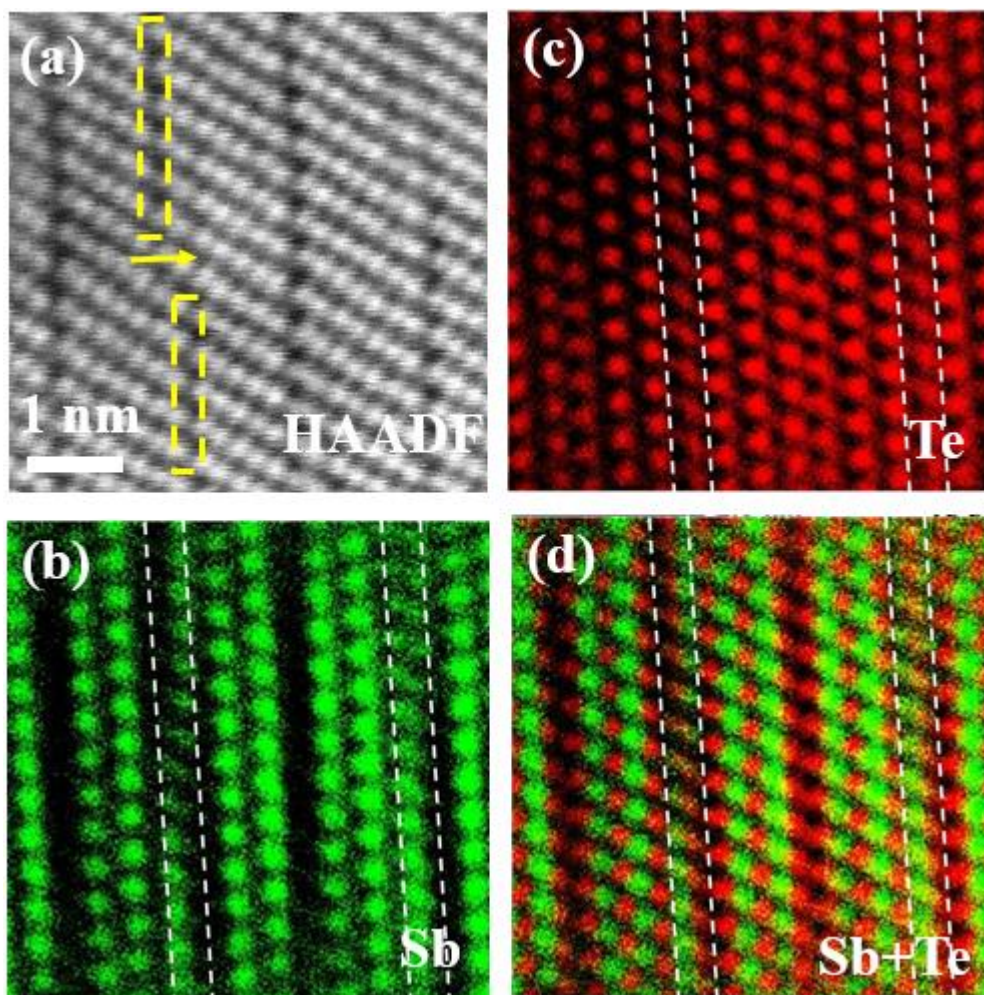

**Fig. S1** (a) HAADF image splitting double layers in the region of 7-layer structure. Yellow dash square is the position of the gap and yellow arrow indicates the moving direction of the gap. (b-d) corresponding EDX maps of Sb, Te and Sb+Te, respectively.

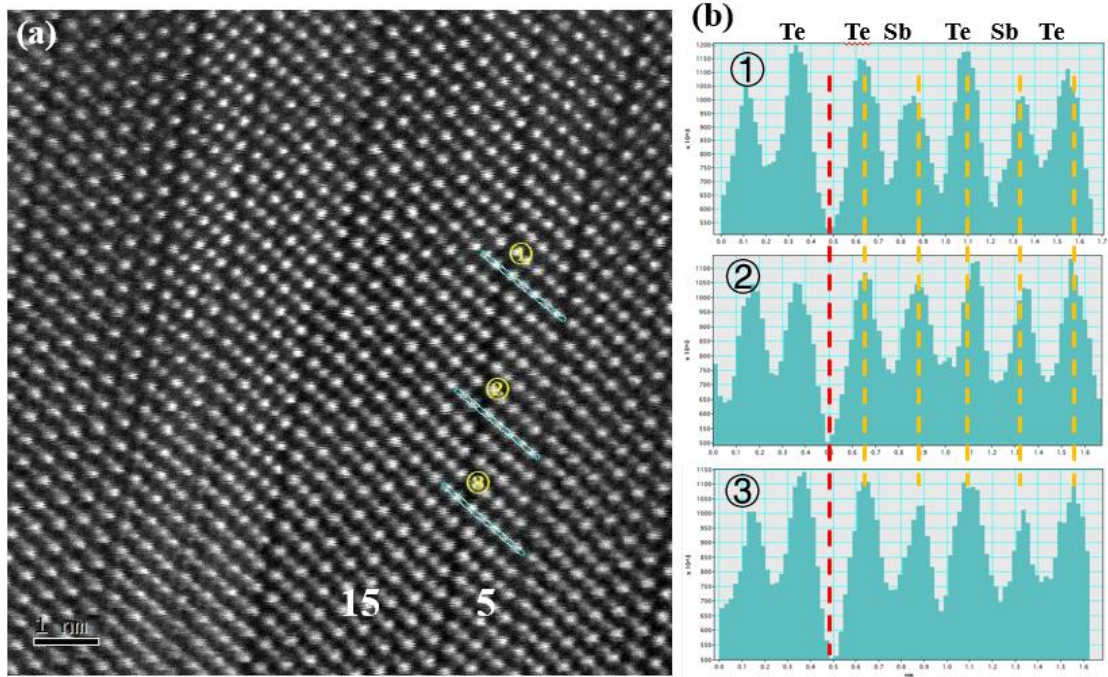

**Fig. S2** Intensity profile indicating the absence of cation atoms among the gaps. (a) HAADF images of GeTe-Sb<sub>2</sub>Te<sub>3</sub> SL showing the area with 15 and quintuple layer. (b) Intensity profile from HAADF images in (a), red dashed line marks the position of the gap.

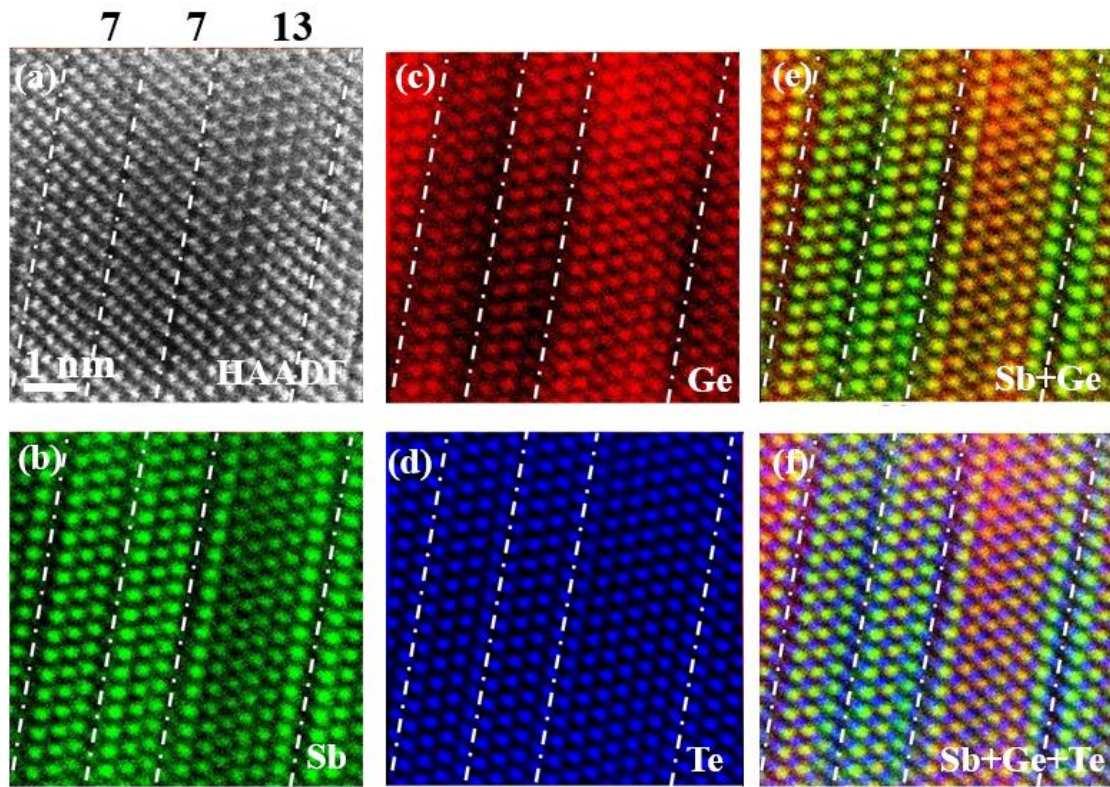

**Fig. S3** (a) HAADF image of 7- and 13-layer structures in GeTe/Sb<sub>2</sub>Te<sub>3</sub> SL. (b-d) corresponding EDX maps of Sb, Te and Sb+Te, respectively.

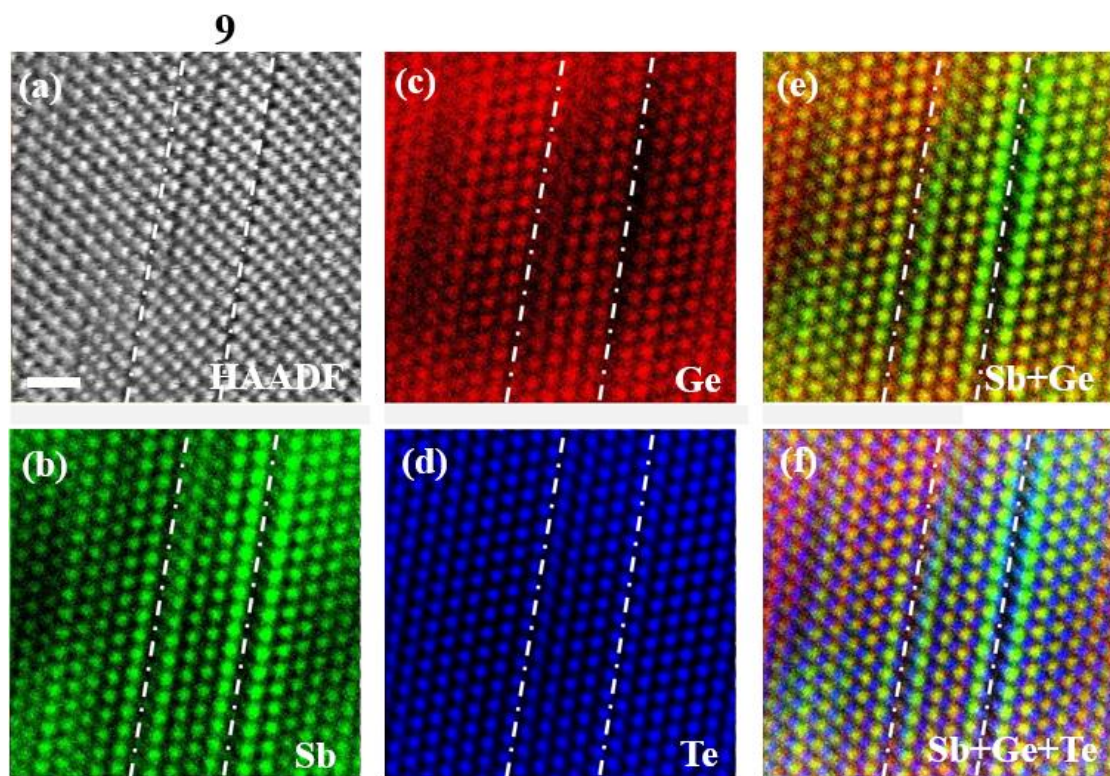

**Fig. S4** (a) HAADF image of 9 layers in GeTe/Sb<sub>2</sub>Te<sub>3</sub> SL. (b-d) corresponding EDX

maps of Sb, Te and Sb+Te, respectively.

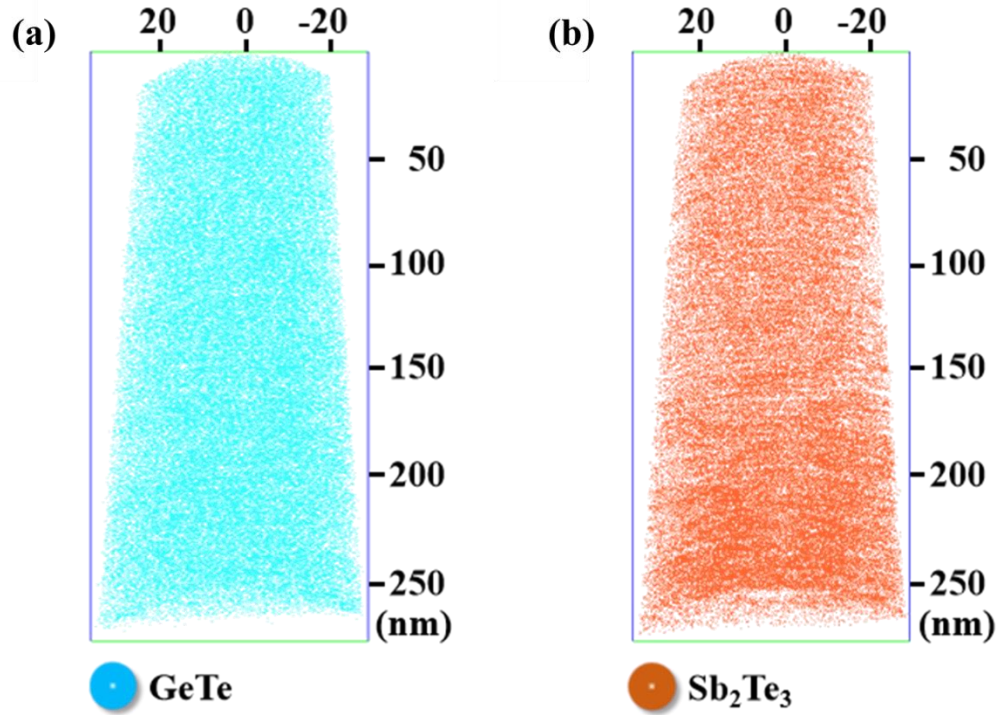

**Fig. S5** Reconstructed three-dimensional mappings of GeTe and Sb<sub>2</sub>Te<sub>3</sub> ions in GeTe/Sb<sub>2</sub>Te<sub>3</sub> SL.

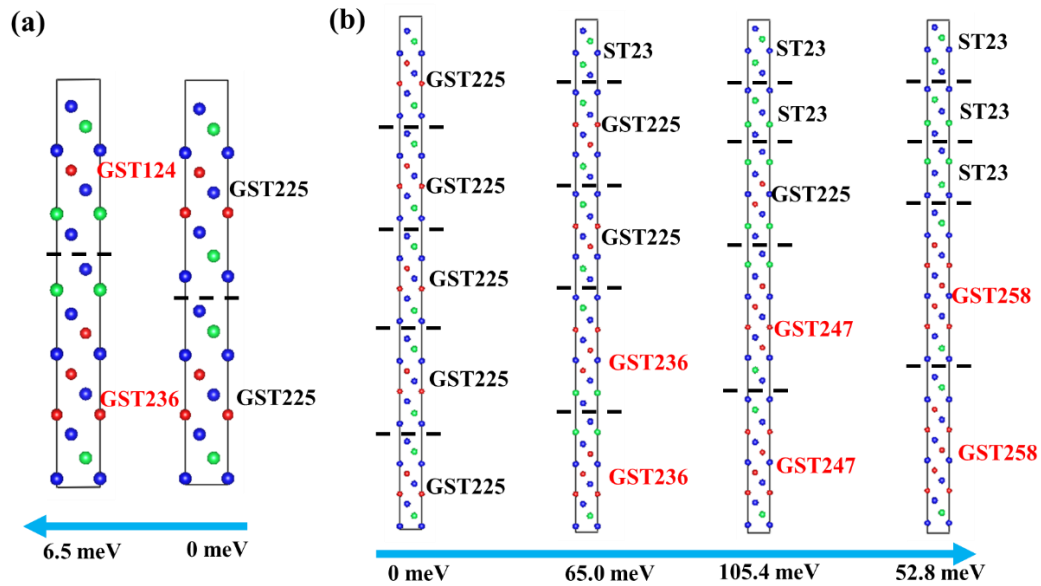

**Fig. S6** The energy difference when the stoichiometric GST225 was constructed into 7 layers (GST124), 11 layers (GST236), 13 layers (GST247) and 15 layers (GST258) caused by the diffusion of cation atoms.
